# Supplementary material
Source: publisher figshare collection journal article supplement (https://frontiersin.figshare.com/ndownloader/files/34003877)
Supplement: Supplementary file [file 34003877]

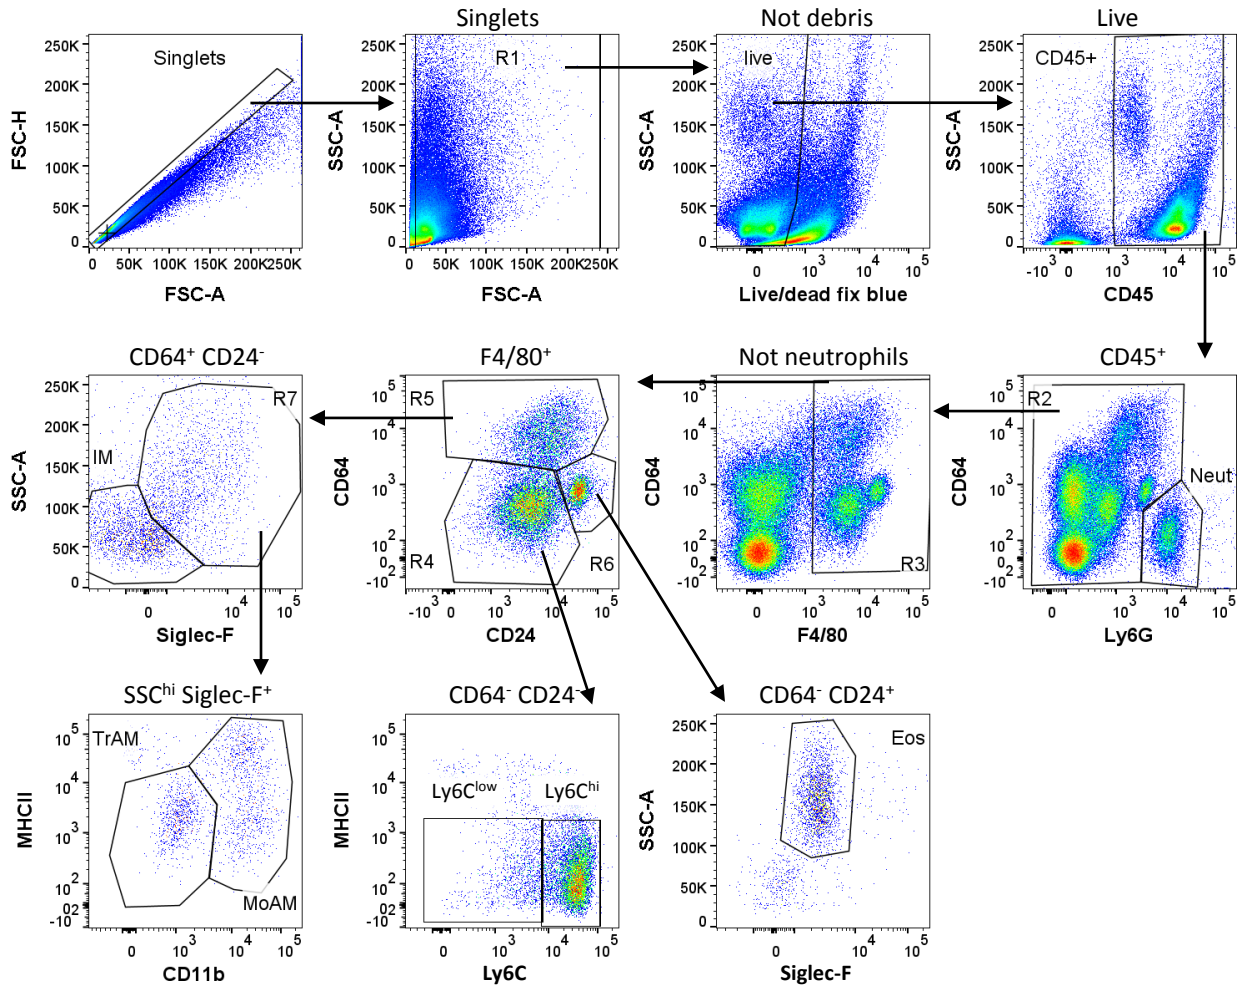

## Supplementary Figure 2. Gating strategy for the identification of myeloid cell populations in the mouse lung

Representative gating is shown on a whole lung digest of a wild type mouse 21 days after IP bleomycin administration. After exclusion of doublets and debris, live cells were selected and immune cells were identified by CD45 staining. Tissue-resident alveolar macrophages (TrAM) were identified as Ly6G<sup>-</sup> F4/80<sup>+</sup> CD64<sup>+</sup> CD24<sup>-</sup> Siglec-F<sup>+</sup> SSC<sup>hi</sup> CD11b<sup>-</sup> whereas monocyte-derived alveolar macrophages (MoAM) are Ly6G<sup>-</sup> F4/80<sup>+</sup> CD64<sup>+</sup> CD24<sup>-</sup> Siglec-F<sup>+</sup> SSC<sup>hi</sup> CD11b<sup>+</sup>. Interstitial macrophages (IM) were identified as Ly6G<sup>-</sup> F4/80<sup>+</sup> CD64<sup>+</sup> CD24<sup>-</sup> Siglec-F<sup>-</sup> SSC<sup>low</sup>. Ly6C<sup>low</sup> and Ly6C<sup>hi</sup> monocytes are Ly6G<sup>-</sup> F4/80<sup>+</sup> CD64<sup>-</sup> CD24<sup>-</sup> MHCII<sup>-</sup>. Gates containing multiple cell populations are labeled as R1-R7. Gates containing a single cell population are labeled with the included cell type. Neutrophils (Neut), eosinophils (Eos).
